# Supplementary material
Source: PubMed Central journal article supplement (PMC7264485)
Supplement: 415_2020_9955_MOESM1_ESM.pdf [file 415_2020_9955_MOESM1_ESM.pdf]

## **SUPPLEMENTAL MATERIAL**

### **Newly Developed Stroke in Patients Admitted to Non-neurological Intensive Care Units**

Authors: Sungyang Jo, MD; Jun Young Chang, MD; Suyeon Jeong, MS; Soo Jeong, MD;

Sang-Beom Jeon, MD, PhD

**Table I.** Initial neurological manifestations

|                                                        | Ischemic IOS<br>(n=182) | Hemorrhagic IOS<br>(n=36) | <i>P</i> Value |
|--------------------------------------------------------|-------------------------|---------------------------|----------------|
| Main symptoms and signs of stroke, n (%)*              |                         |                           |                |
| Altered mental status                                  | 113 (62.1)              | 36 (100.0)                | <0.001         |
| Hemiparesis                                            | 54 (29.7)               | 1 (2.8)                   | <0.001         |
| Seizure                                                | 25 (13.7)               | 3 (8.3)                   | 0.281          |
| Pupillary change                                       | 7 (3.8)                 | 9 (25.0)                  | <0.001         |
| Aphasia                                                | 9 (4.9)                 | 0 (0)                     | <0.001         |
| Others                                                 | 10 (5.5)                | 0 (0)                     | <0.001         |
| Consciousness at the time of stroke recognition, n (%) |                         |                           |                |
| Alert                                                  | 66 (36.3)               | 3 (8.3)                   | <0.001         |
| Drowsy                                                 | 62 (34.1)               | 5 (13.9)                  | 0.011          |
| Stuporous                                              | 29 (15.9)               | 9 (25.0)                  | 0.143          |
| Comatose                                               | 25 (13.7)               | 19 (52.8)                 | <0.001         |
| Events before the detection of stroke, n (%)           |                         |                           |                |
| Cardiovascular surgery                                 | 65 (35.7)               | 9 (25.0)                  | 0.300          |
| Non-cardiovascular surgery                             | 5 (2.7)                 | 6 (16.7)                  | 0.001          |
| Cardiovascular procedure                               | 26 (14.3)               | 1 (2.8)                   | 0.020          |
| Cardiac arrest                                         | 17 (9.3)                | 1 (2.8)                   | 0.800          |

\*Multiple symptoms were documented for each patient

Abbreviations: IOS = intensive care unit-onset stroke
